# Supplementary material for: Copper Exposure Induces Epithelial-Mesenchymal Transition-Related Fibrotic Change via Autophagy and Increase Risk of Lung Fibrosis in Human
Source: MDPI journal article supplement (doi:10.3390/antiox12020532), 2023-02-20
Supplement: s1 [file s1]

**Supplementary materials**

**Table S1 Demographic characteristics and lung fibrotic changes of all participants (n= 1458)**

**Table S2 Comparison of urinary copper levels between demographic characteristics (n= 1458)**

**Table S1 Demographic characteristics and lung fibrotic changes of all participants (n= 1458)**

| <b>Characteristics</b>                     | <b>All participants</b>      |
|--------------------------------------------|------------------------------|
| Continuous variable, mean $\pm$ SD (range) |                              |
| Age (yrs.)                                 | 57.7 $\pm$ 11.2(39.0,84.0)   |
| BMI (Kg/m <sup>2</sup> )                   | 25.0 $\pm$ 3.8(14.3,43.7)    |
| Waist circumference (cm)                   | 83.0 $\pm$ 10.4(43.0,128.0)  |
| Systolic blood pressure (mmHg)             | 132.5 $\pm$ 20.3(77.0,235.0) |
| Diastolic blood pressure (mmHg)            | 77.2 $\pm$ 11.5(45.0,136.0)  |
| Category variable; n (%)                   |                              |
| Gender                                     |                              |
| Female                                     | 983(67.4)                    |
| Male                                       | 475(32.6)                    |
| Diabetes mellitus history                  |                              |
| No                                         | 1294(88.8)                   |
| Yes                                        | 164(11.2)                    |
| Hypertension history                       |                              |
| No                                         | 1056(72.4)                   |
| Yes                                        | 402(27.6)                    |
| Betel chewing                              |                              |
| No                                         | 1454(99.7)                   |
| Yes                                        | 4(0.3)                       |
| Alcohol consumption                        |                              |
| No                                         | 1225(84.0)                   |
| Yes                                        | 233(16.0)                    |
| Education                                  |                              |
| $\leq$ junior high school                  | 756(51.9)                    |
| Senior high school                         | 439(30.1)                    |
| $\geq$ college                             | 263(18.0)                    |
| Physical activity <sup>a</sup>             |                              |
| No                                         | 345(23.7)                    |
| Yes                                        | 1113(76.3)                   |
| Air purifier                               |                              |
| No                                         | 226(15.5)                    |
| Yes                                        | 1232(84.5)                   |
| Lung fibrotic change                       |                              |
| No                                         | 930(63.8)                    |
| Yes                                        | 528(36.2)                    |

<sup>a</sup>Do you undertake at least 150 min per week of moderate-intensity aerobic activity or 75 min per week of vigorous aerobic activity or an equivalent combination?

**Table S2 Comparison of urinary copper levels between demographic characteristics (n=1458)**

| Characteristics           | Urinary copper, $\mu\text{g/dL}$ | p      |
|---------------------------|----------------------------------|--------|
| Mean $\pm$ SD (range)     |                                  |        |
| Gender                    |                                  | 0.014  |
| Female                    | 1.57 $\pm$ 0.85(0.05,9.94)       |        |
| Male                      | 1.64 $\pm$ 0.89(0.20,7.24)       |        |
| Age (yrs)                 |                                  | <0.001 |
| $\leq 60$                 | 1.44 $\pm$ 0.68(0.05,7.00)       |        |
| >60                       | 1.66 $\pm$ 0.92(0.05,9.94)       |        |
| BMI (kg/m <sup>2</sup> )  |                                  | <0.001 |
| $\leq 24$                 | 1.52 $\pm$ 0.79(0.05,7.00)       |        |
| >24                       | 1.65 $\pm$ 0.91(0.05,9.94)       |        |
| Education                 |                                  | <0.001 |
| $\leq$ junior high school | 1.68 $\pm$ 0.96(0.05,9.94)       |        |
| Senior high school        | 1.57 $\pm$ 0.80(0.05,7.15)       |        |
| $\geq$ college            | 1.39 $\pm$ 0.57(0.20,3.87)       |        |
| Diabetes mellitus history |                                  | <0.001 |
| No                        | 1.53 $\pm$ 0.78(0.05,8.25)       |        |
| Yes                       | 2.12 $\pm$ 1.23(0.34,9.94)       |        |
| Hypertension history      |                                  | <0.001 |
| No                        | 1.51 $\pm$ 0.75(0.05,7.00)       |        |
| Yes                       | 1.80 $\pm$ 1.07(0.05,9.94)       |        |
| Hyperlipidemia            |                                  | 0.446  |
| No                        | 1.59 $\pm$ 0.86(0.05,9.94)       |        |
| Yes                       | 1.66 $\pm$ 0.85(0.38,4.59)       |        |
| Alcohol consumption       |                                  | 0.718  |
| No                        | 1.60 $\pm$ 0.87(0.05,9.94)       |        |
| Yes                       | 1.58 $\pm$ 0.83(0.30,7.24)       |        |
| Physical activity         |                                  | 0.506  |
| No                        | 1.55 $\pm$ 0.75(0.37,7.00)       |        |
| Yes                       | 1.61 $\pm$ 0.89(0.05,9.94)       |        |
| Air purifier              |                                  | 0.016  |
| No                        | 1.47 $\pm$ 0.73(0.05,4.54)       |        |
| Yes                       | 1.62 $\pm$ 0.88(0.05,9.94)       |        |
